# Supplementary material
Source: PubMed Central journal article supplement (PMC5910208)

## Supplementary Information

**Functional and Structural Analysis of Phenazine *O*-Methyltransferase LaPhzM from  
*Lysobacter antibioticus* OH13 and One-Pot Enzymatic Synthesis of the Antibiotic Myxin**

**Jiasong Jiang,<sup>†</sup> Daisy Guiza Beltran,<sup>‡</sup> Andrew Schacht,<sup>‡</sup> Limei Zhang,<sup>\*,‡,§</sup> Stephen Wright,<sup>†</sup>  
and Liangcheng Du<sup>\*,†</sup>**

<sup>†</sup>Departments of Chemistry, University of Nebraska-Lincoln, NE 68588, USA

<sup>‡</sup>Departments of Biochemistry, <sup>§</sup>Redox Biology Center and the Nebraska Center for Integrated Biomolecular Communication, University of Nebraska-Lincoln, NE 68588, USA

**Table S1.** Sequence of primers used for the *LaPhzM* expression

---

|                  |                                               |
|------------------|-----------------------------------------------|
| <b>LaPhzM-PF</b> | <b><u>CCGGAATTC</u> ATGACTGAGAATAACCGTGCC</b> |
| <b>LaPhzM-PR</b> | <b><u>CCCAAGCTT</u> TCAGATCGGACGCGCTTC</b>    |

---

**Table S2.** Summary of the data processing statistics.

---

|                                     |                           |
|-------------------------------------|---------------------------|
| Space Group                         | P2 <sub>1</sub>           |
| Cell Dimensions                     |                           |
| a, b, c (Å)                         | 56.28, 81.02, 72.06       |
| β                                   | 98.23°                    |
| Resolution (Å) <sup>a</sup>         | 40.0 — 1.42 (1.50 — 1.42) |
| R <sub>merge</sub> (%) <sup>a</sup> | 4.1 (44.1)                |
| R <sub>pim</sub> (%) <sup>a</sup>   | 2.6 (28.2)                |
| Unique reflections <sup>a</sup>     | 395,285 (58,771)          |
| Multiplicity <sup>a</sup>           | 3.4 (3.4)                 |
| Completeness (%) <sup>a</sup>       | 97.1 (98.0)               |
| I/σ(I) <sup>a</sup>                 | 15.3 (2.7)                |

---

<sup>a</sup>The numbers in the parentheses are the values for the outer shells.

**Table S3.** Summary of the refinement statistics.

---

|                                    |                                                                                 |
|------------------------------------|---------------------------------------------------------------------------------|
| Resolution (Å)                     | 40.0 — 1.42                                                                     |
| R <sub>work</sub> (%)              | 18.1                                                                            |
| R <sub>free</sub> (%)              | 20.2                                                                            |
| Protein residues                   | 664 (2 chains)                                                                  |
| Ligands                            | 2 SAH, 3 HCO <sub>2</sub> <sup>-</sup> , 3 Na <sup>+</sup> , P33 (PEG fragment) |
| water                              | 494                                                                             |
| Average B-factor (Å <sup>2</sup> ) |                                                                                 |
| Protein and Ligands                | 18.5                                                                            |
| Solvent                            | 26.4                                                                            |
| RMSD (bonds) (Å)                   | 0.012                                                                           |
| RMSD(Angles) (°)                   | 1.537                                                                           |
| Ramachandran Statistics            |                                                                                 |
| Favored (%)                        | 98.5                                                                            |
| Allowed (%)                        | 1.5                                                                             |
| Outliers (%)                       | 0.00                                                                            |
| PDB ID                             | 6C5B                                                                            |

---

**Figure S1.** Multiple alignment of the amino acid sequence of LaPhzM with homologous sequences (A) and a comparison between LaPhzM from *Lysobacter antibioticus* OH13 and PhzM from *Pseudomonas aeruginosa* (B).

A

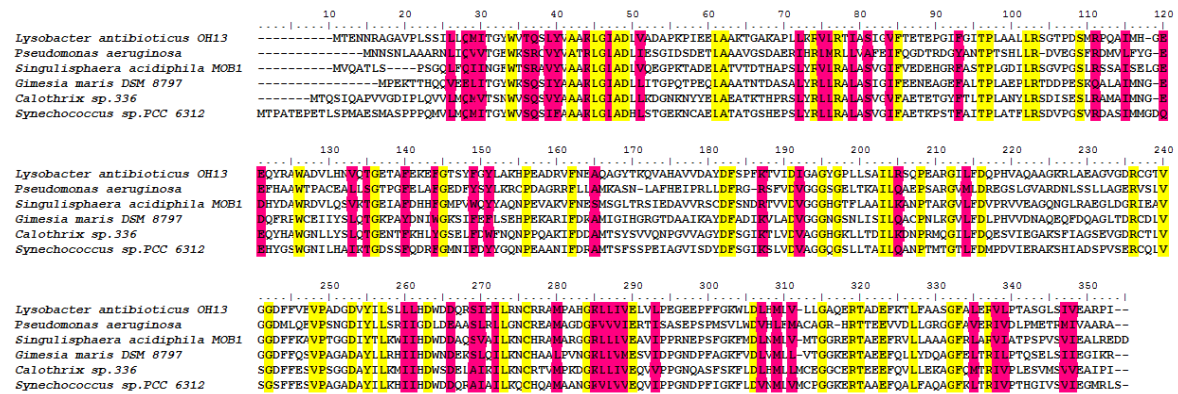

B

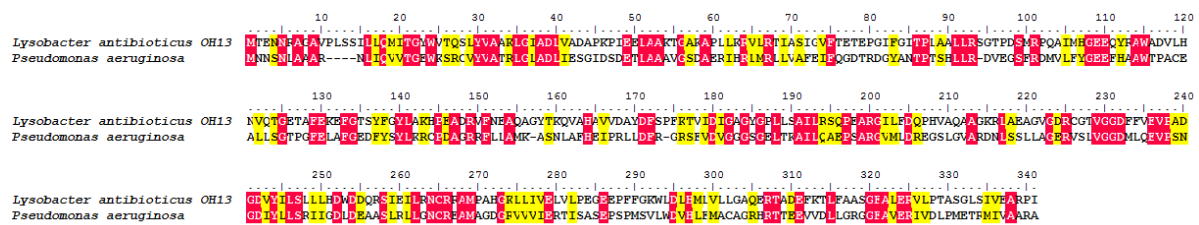

**Figure S2.** SDS-PAGE of LaPhzM produced in *E. coli*. The expected size of LaPhzM is 36.7 kDa.

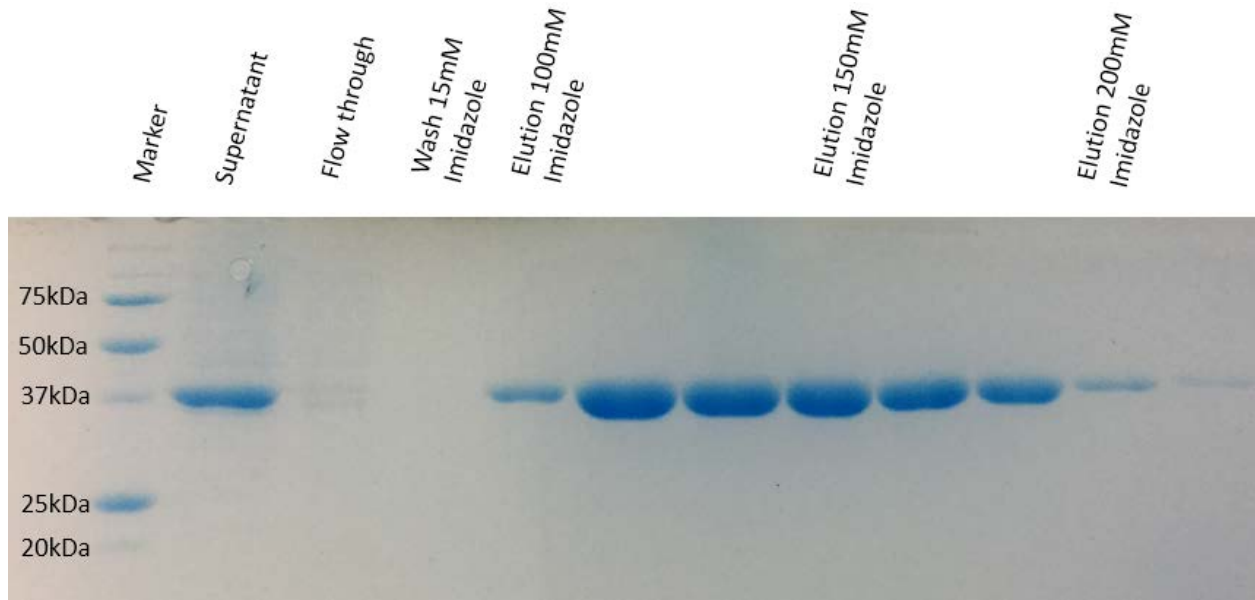

**Figure S3.** Enzyme kinetics of LaPhzM with 6-hydroxy-1-methoxyphenazine *N*5-oxide (**2**) as substrate to produce 1,6-dimethoxyphenazine *N*5-oxide (**4**). Lineweaver-Burk plot was used to determine  $K_M$  and  $V_{max}$ .

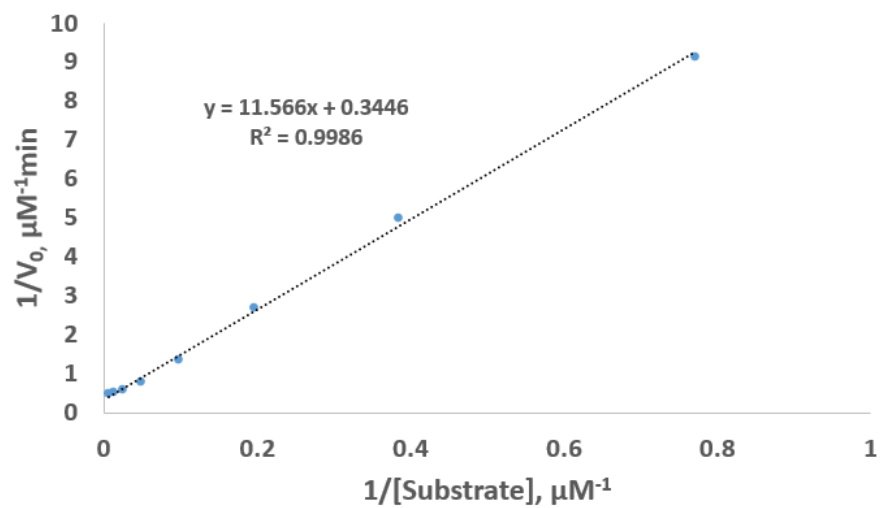

**Figure S4.** MS analysis of *in vitro* reaction products of LaPhzM. A. 1,6-dimethoxyphenazine *N*5-oxide (**4**); B. 1,6-dihydroxyphenazine (**7**); C. 1-hydroxy-6-methoxyphenazine (**6**); D. 1,6-dimethoxyphenazine (**5**); E. 1-hydroxyphenazine (**10**); F. 1-methoxyphenazine (**11**); G. pyocyanin; H. 1,6-dihydroxyphenazine *N*5-oxide (**8**); I. myxin (**1**); J. 1,6-dimethoxyphenazine *N*5,*N*10-dioxide (**9**).

A

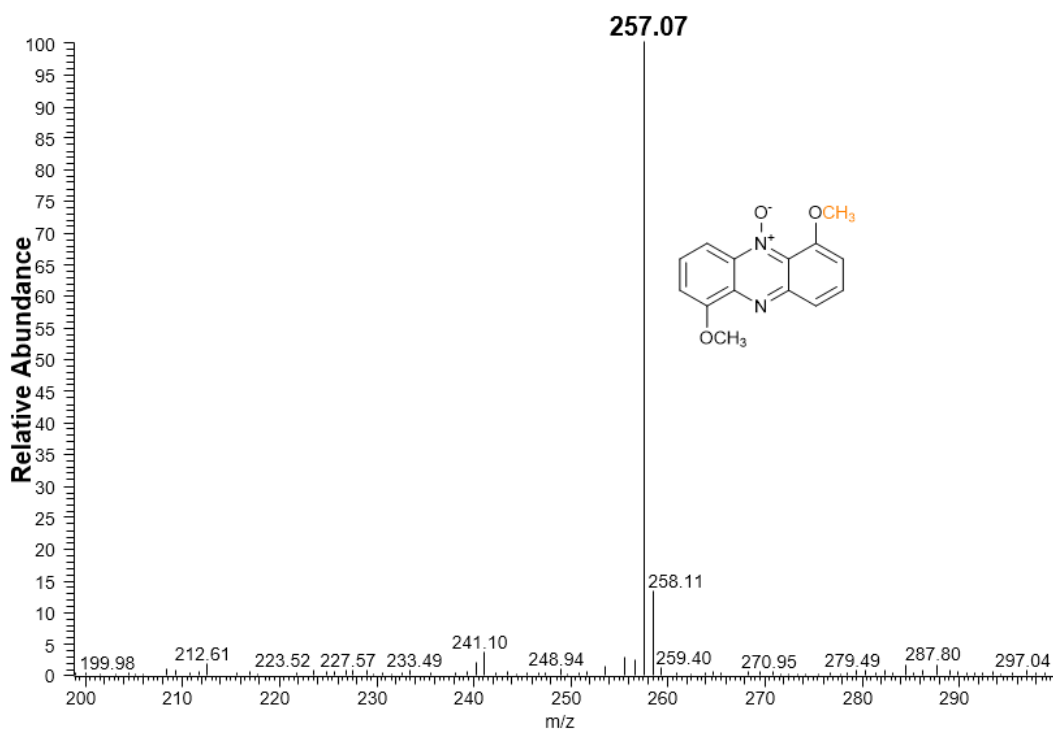

B

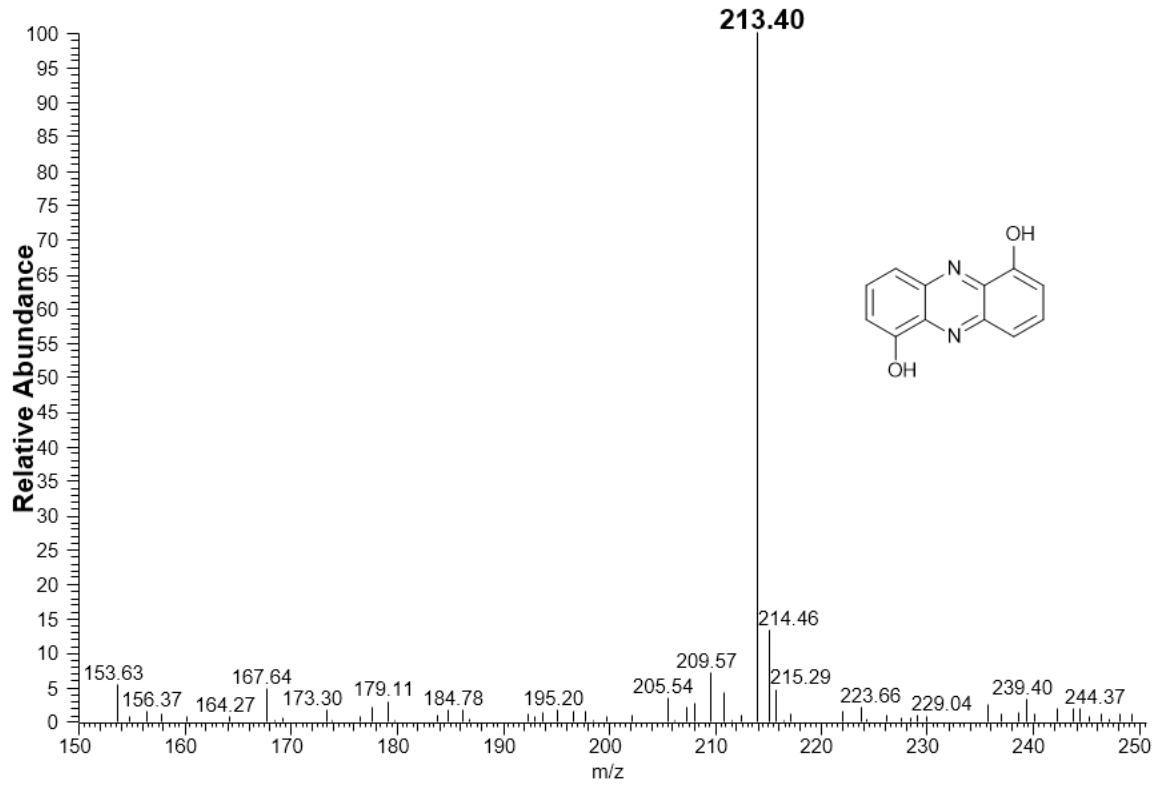



C

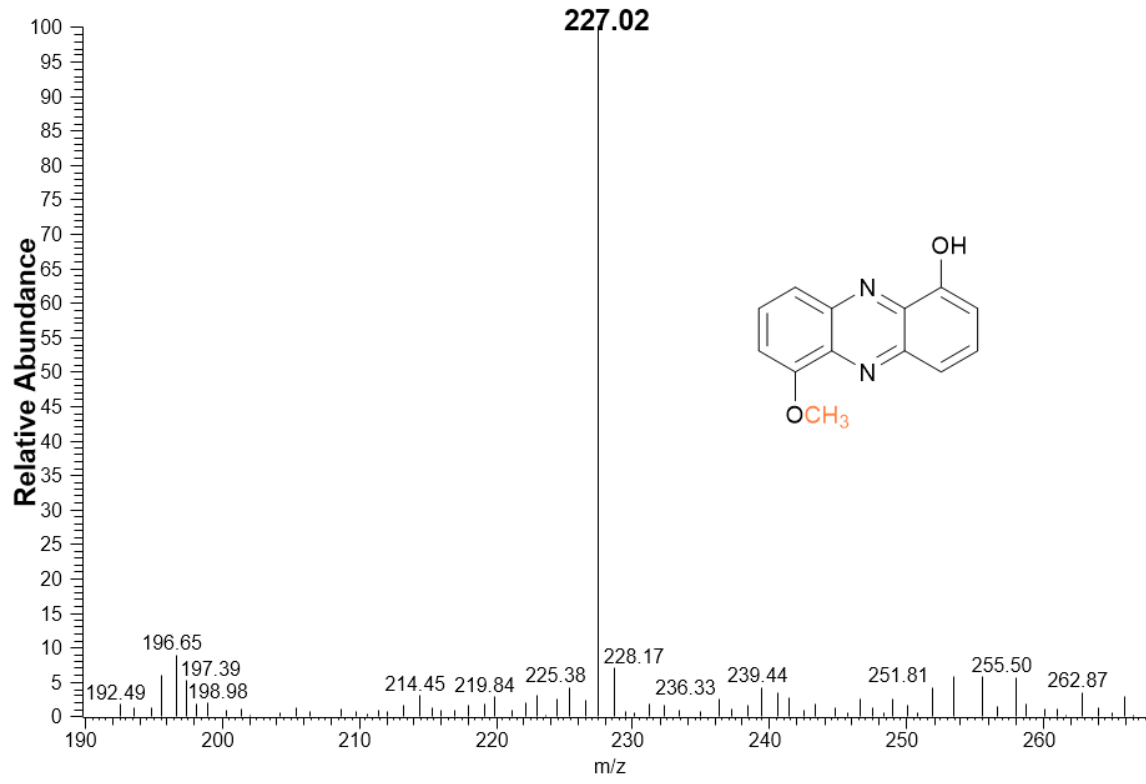

D

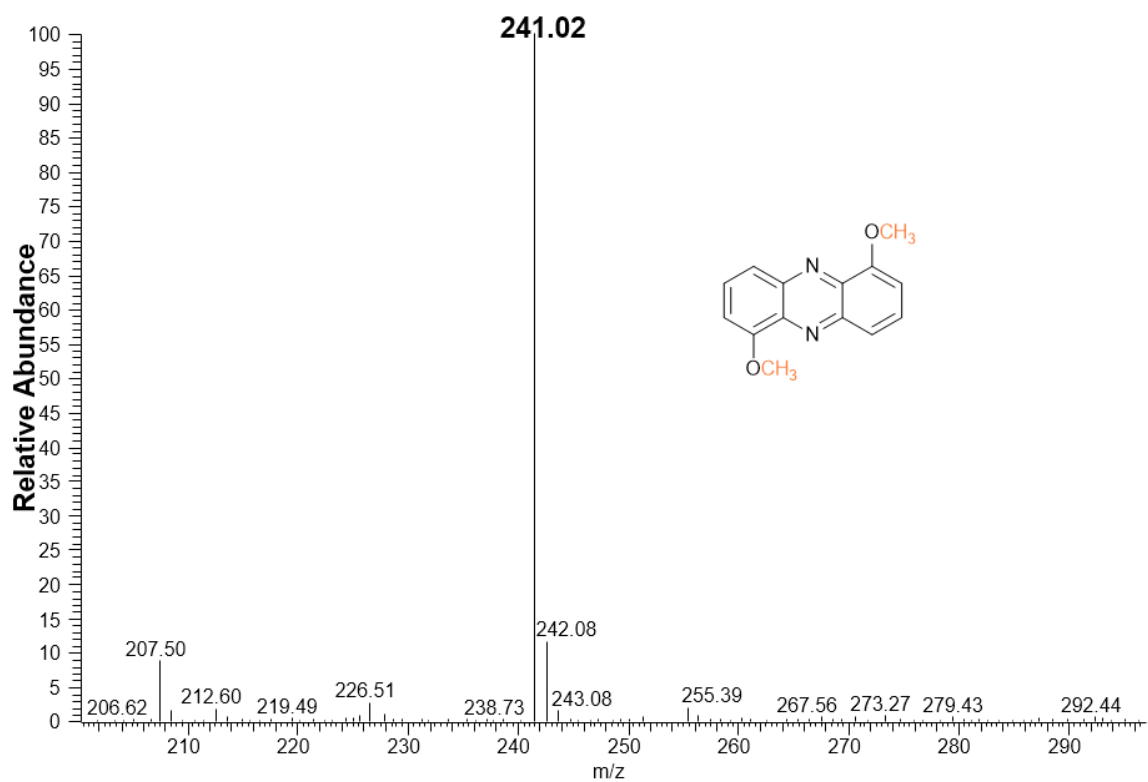

E

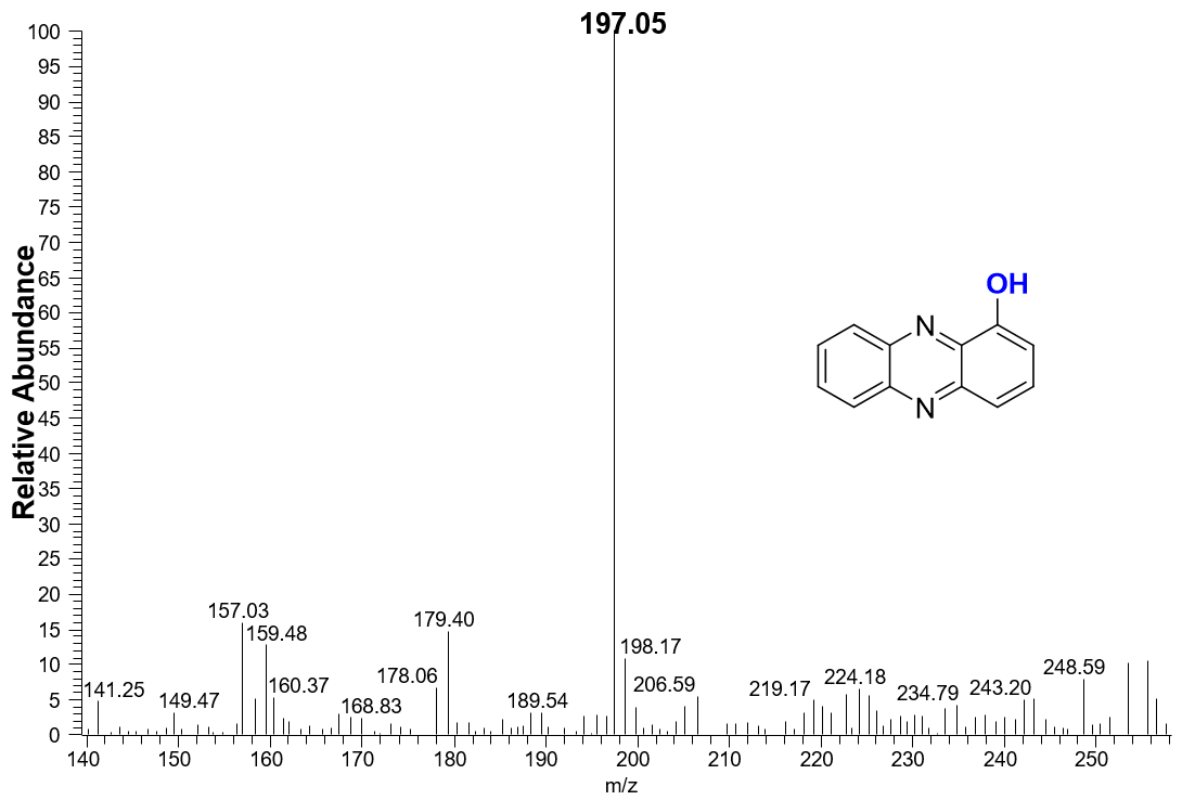

F

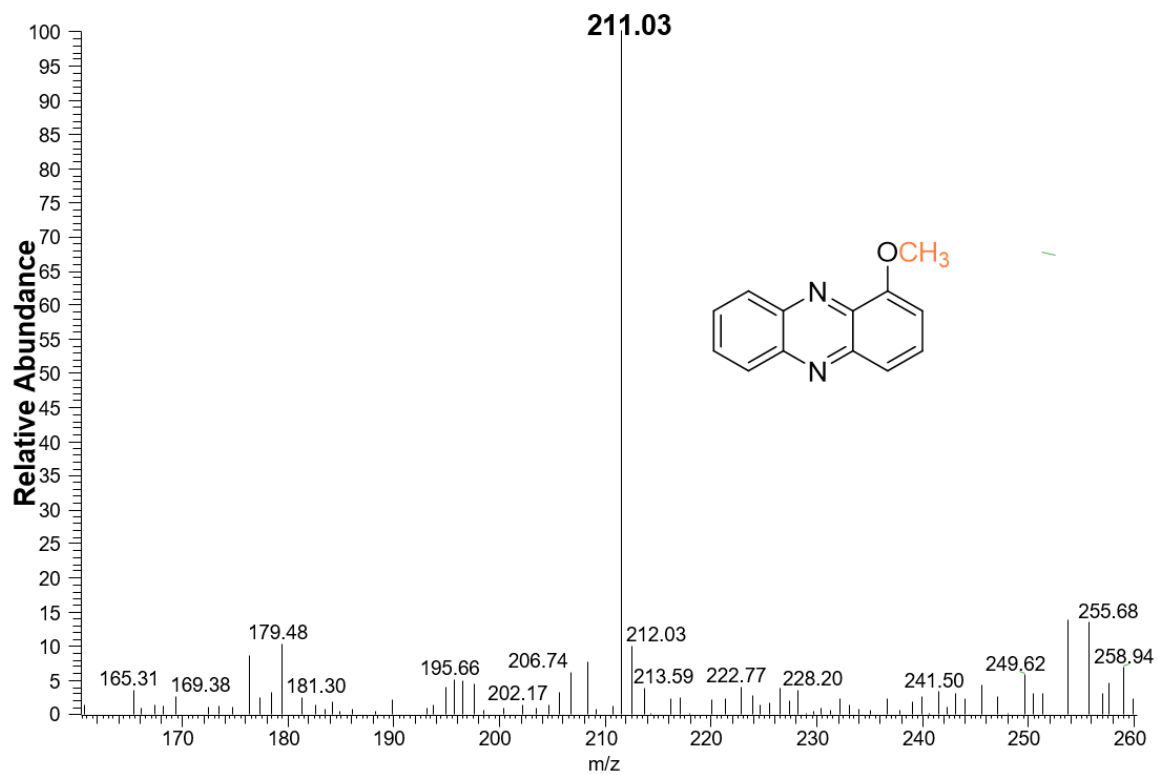

G

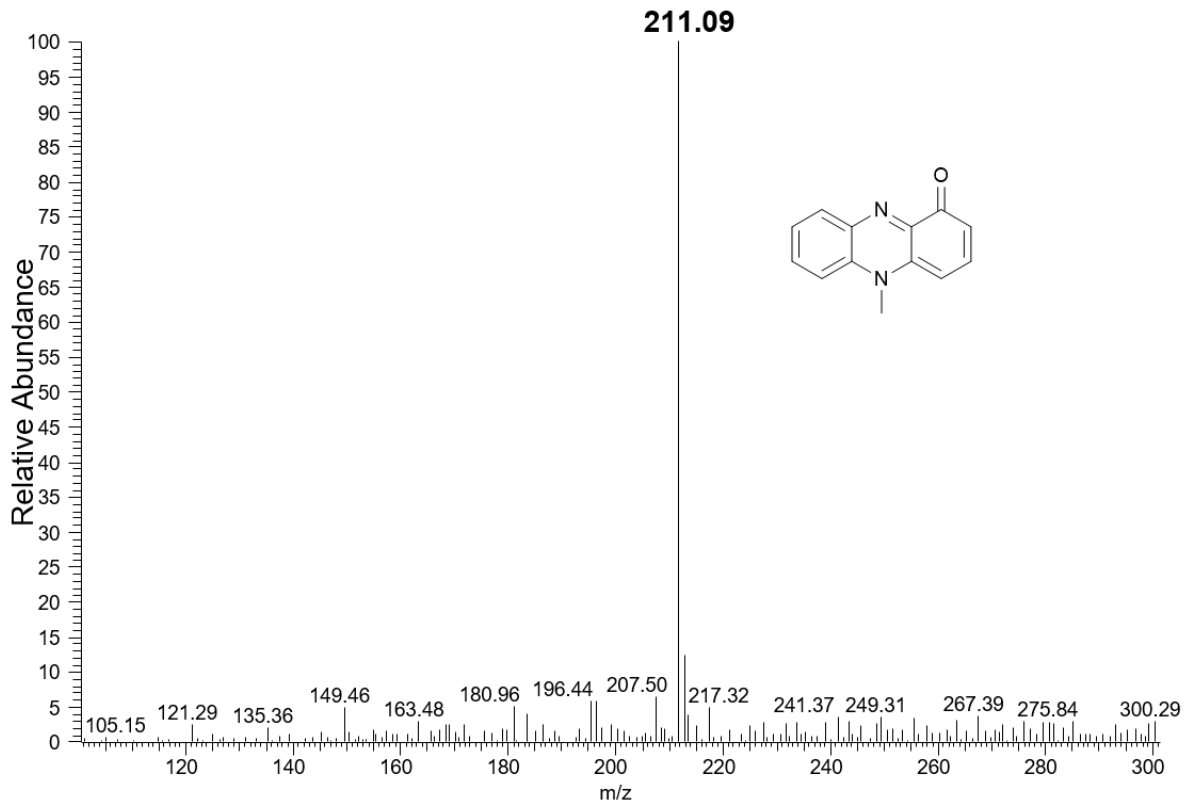

H

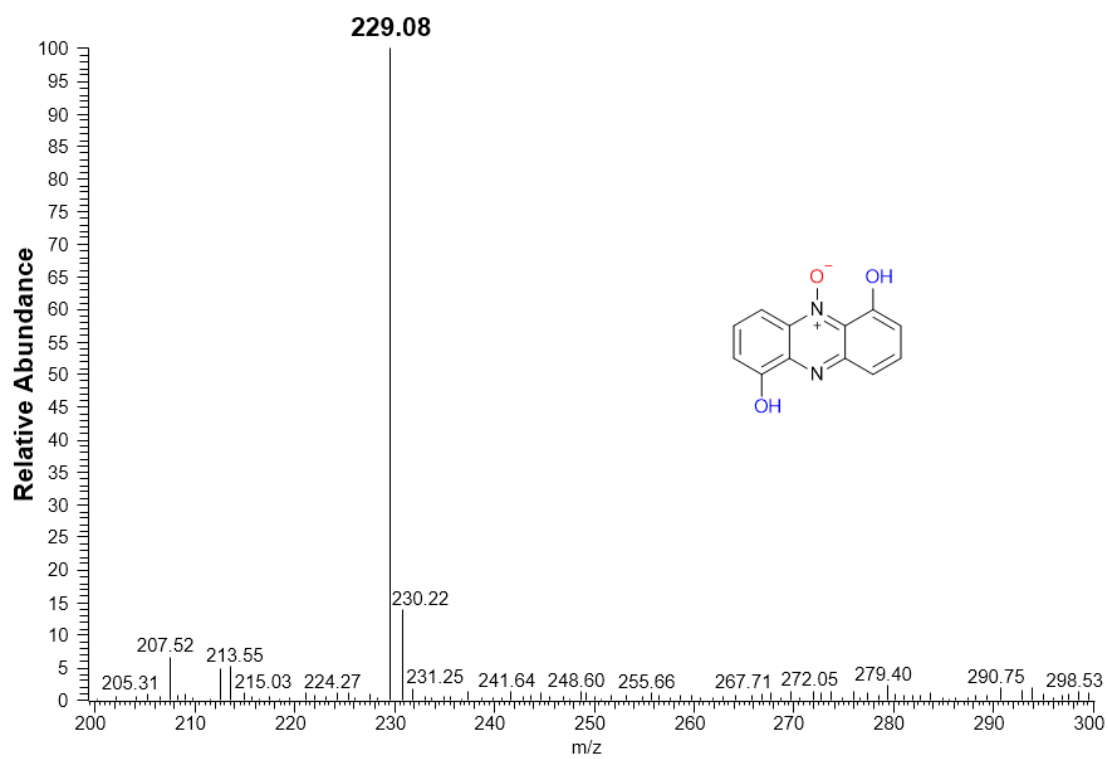

I

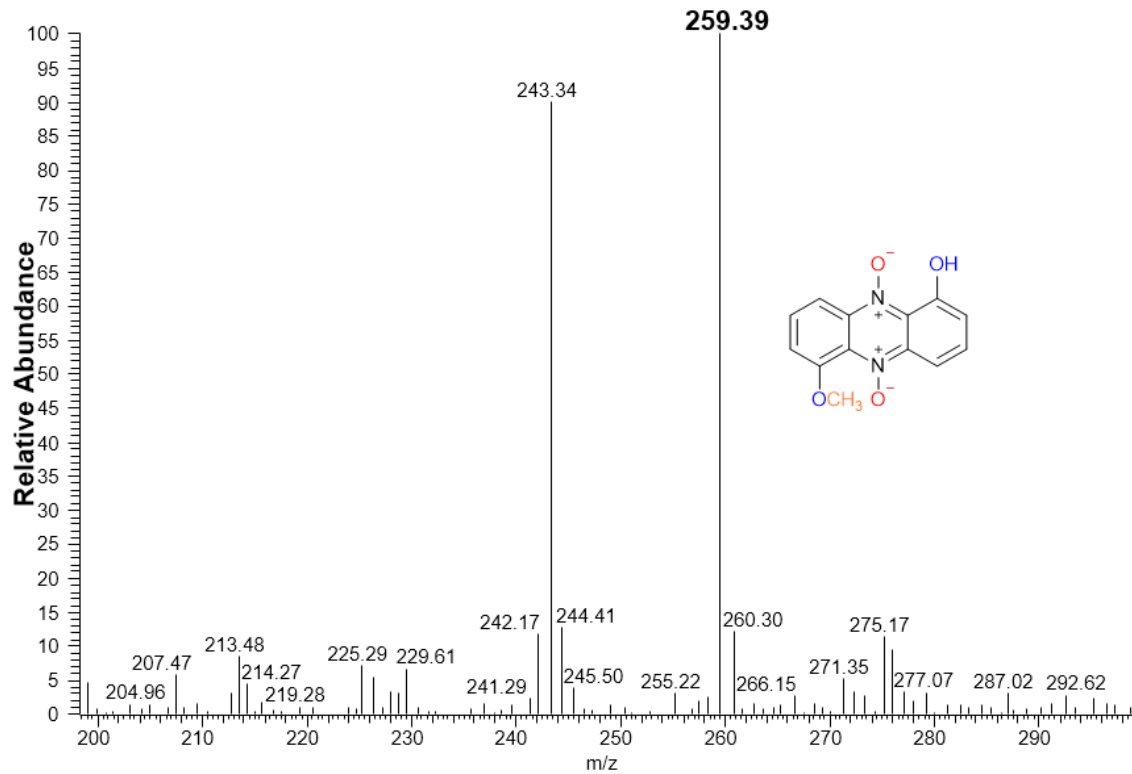

J

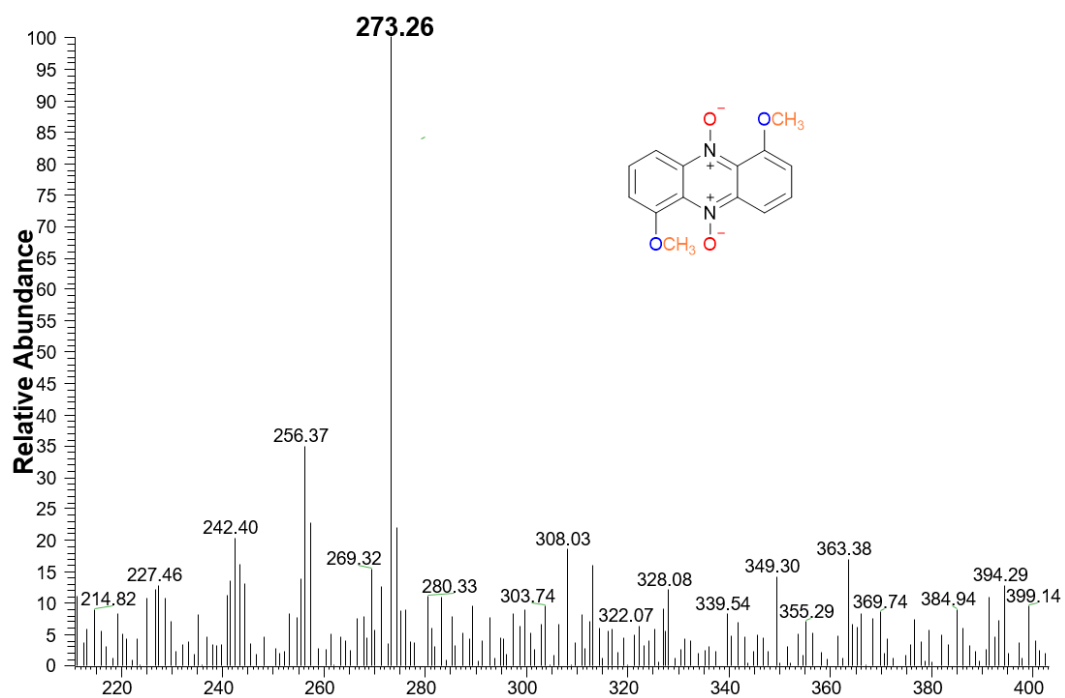



**Figure S5.** Relative reaction rate of LaPhzM toward different substrates. Note that when **7** was the substrate, the reaction condition was set to make **6** as the predominate product, with only a negligible amount of **5** produced.

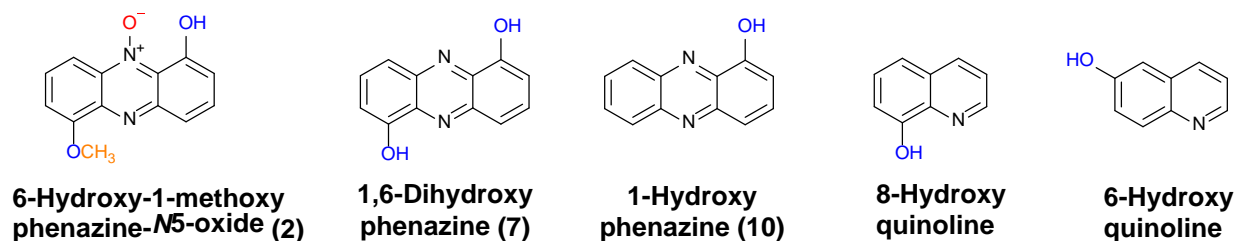

| <u>Substrate</u>          | <u>Relative Rate</u> |
|---------------------------|----------------------|
| <b>2</b>                  | <b>100 ± 2.8</b>     |
| <b>7</b>                  | <b>264 ± 7.4</b>     |
| <b>10</b>                 | <b>172 ± 3.5</b>     |
| <b>8-hydroxyquinoline</b> | <b>9 ± 1.0</b>       |
| <b>6-hydroxyquinoline</b> | <b>3 ± 0.6</b>       |

**Figure S6.** Overview of the three-dimensional crystallographic structure of the LaPhzM-SAH complex. (A) The ribbon representation of the LaPhzM dimer, with the two protomers colored cyan and pale-cyan, respectively. The *S*-adenosyl-L-homocysteine (SAH) molecules are shown in sticks and colored by the atom type. (B) The secondary structure elements in a LaPhzM monomer with helices ( $\alpha$ 1-16) highlighted in cyan, strands ( $\beta$ 1-9) in magenta and loops (not numbered) in salmon red.

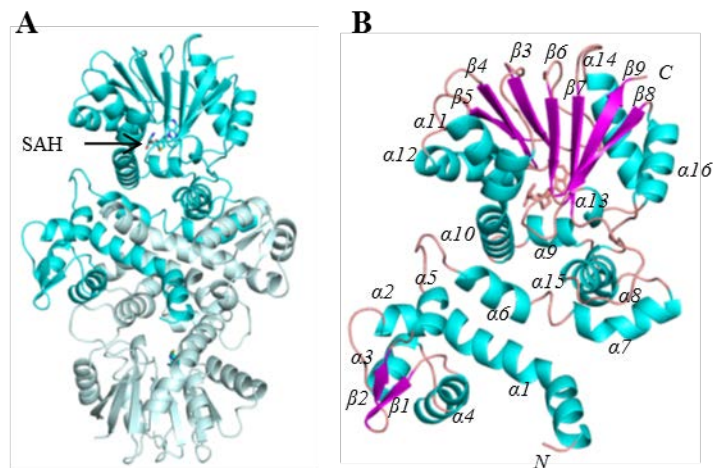

**Figure S7.** Comparison of the secondary structural elements between LaPhzM and (A) MmcR (PDB ID: 3GWZ, overall r.m.s.d. of  $C\alpha = 1.95 \text{ \AA}$ ) and (B) PhzM (PDB ID: 2IP2, overall r.m.s.d. of  $C\alpha = 3.40 \text{ \AA}$ ). LaPhzM is highlighted in cyan and MmcR/PhzM in magenta. The main differences between LaPhzM and MmcR lie in the loop region (residues 93 - 102) connecting the dimerization and catalytic domains. When the residues 10 - 93 and 94 - 341 of LaPhzM are overlaid with MmcR separately, it gives the core r.m.s.d of  $0.98 \text{ \AA}$  and  $1.42 \text{ \AA}$ , respectively.

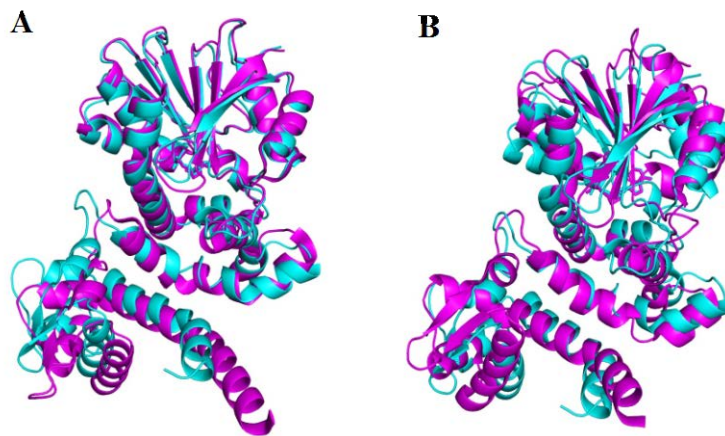

**Figure S8.** Stick representation of the SAH-binding environment in LaPhzM (carbon atoms in cyan) and MmcR (PDB ID: 3GXO, colored in gray). The residue labels are colored black for LaPhzM and gray for MmcR in the round bracket. For atoms in LaPhzM, the nitrogen atoms are highlighted in blue color, oxygen in red and sulfur in yellow.

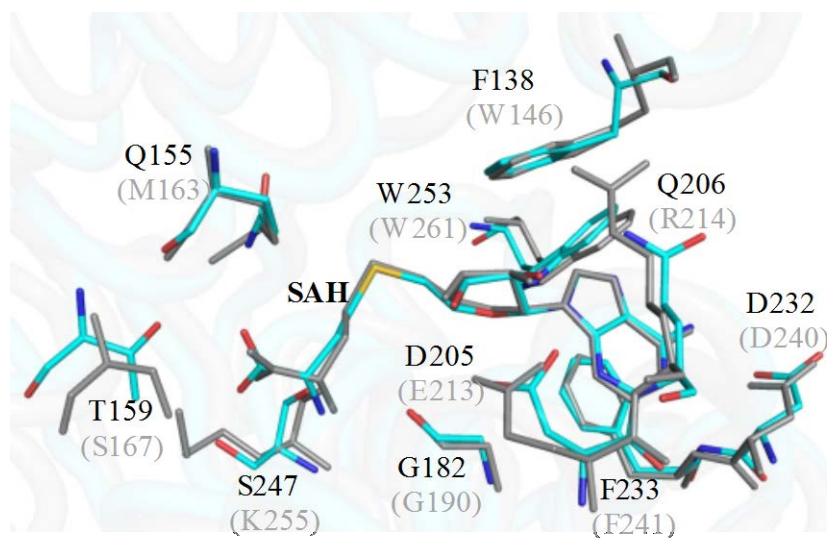

**Figure S9.** A model of LaPhzM in complex with 6-hydroxy-1-methoxyphenazine *N*5-oxide (**2**) at the catalytic site. **2** was fit into the LaPhzM structure by autodocking as described in the methods. The carbon atoms are highlighted in cyan, hydrogen in white, nitrogen in blue, oxygen in red and sulfur in yellow. The potential hydrogen bonds are highlighted by the dash lines.

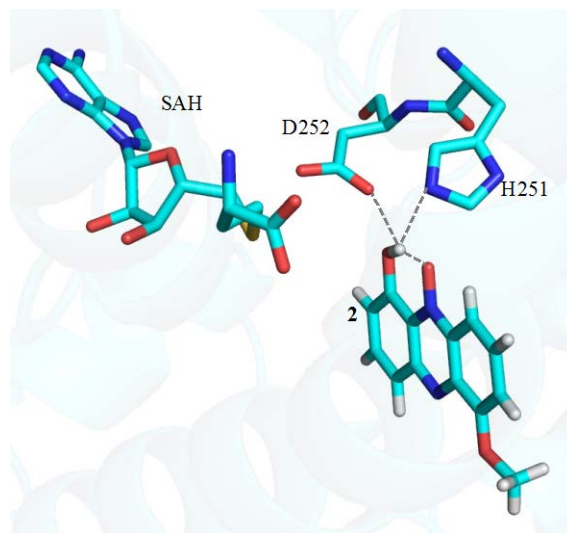

Supplement: NIHMS952405-supplement-Supporting_Information.pdf [file NIHMS952405-supplement-Supporting_Information.pdf]
